# Supplementary material for: Implementation of Lean Management in a Multi-Specialist Hospital in Poland and the Analysis of Waste
Source: MDPI journal article supplement (doi:10.3390/ijerph19020800), 2022-01-12
Supplement: s1 [file s1]

|                                            |                                     |               |         |
|--------------------------------------------|-------------------------------------|---------------|---------|
| DEPARTMENT:                                | REPORT A3                           | DATE:         | LEADER: |
| PROCES:                                    |                                     | PARTICIPANTS: |         |
| 1) DEFINITION OF THE PROBLEM               | 5) DEVELOPMENT OF REMEDIAL MEASURES |               |         |
| 2) ANALYSIS OF THE PROBLEM                 | 6) IMPLEMENTATION<br><i>DO</i>      |               |         |
| 3. SETTING A TARGET                        | 7) VERIFICATION<br><i>CHECK</i>     |               |         |
| 4) SEARCHING FOR THE CAUSES OF THE PROBLEM | 8) STANDARDISATION<br><i>ACT</i>    |               |         |
