# Supplementary material for: Implementation of Lean Management in a Multi-Specialist Hospital in Poland and the Analysis of Waste
Source: MDPI journal article supplement (doi:10.3390/ijerph19020800), 2022-01-12
Supplement: s1 [file s1]

## A.2

| Question                                                                                                                                   | Answers      |
|--------------------------------------------------------------------------------------------------------------------------------------------|--------------|
|                                                                                                                                            | Interviewee: |
| What areas in the Internal Medicine Department, Gastroenterology Department and Admission Room for Adults need improvement?                |              |
| What tasks performed by medical personnel engage them to the greatest extent and are not directly understood as providing health services? |              |
| What are your expectations towards the implementation of a lean management project?                                                        |              |
| Do you have any concerns about the project? What are they about?                                                                           |              |
