# Supplementary material for: Implementation of Lean Management in a Multi-Specialist Hospital in Poland and the Analysis of Waste
Source: MDPI journal article supplement (doi:10.3390/ijerph19020800), 2022-01-12
Supplement: s1 [file s1]

## A.3

| Question                                                                                                           | Answers      |
|--------------------------------------------------------------------------------------------------------------------|--------------|
|                                                                                                                    | Interviewee: |
| Have the project met your expectations? How do you evaluate the way it was carried out and the proposed solutions? |              |
| Have the concerns you had before starting the project been confirmed? If so, which ones and why?                   |              |
