# Supplementary material for: Implementation of Lean Management in a Multi-Specialist Hospital in Poland and the Analysis of Waste
Source: Int J Environ Res Public Health. 2022 Jan 12;19(2):800. doi: 10.3390/ijerph19020800 (PMC8775623; doi:10.3390/ijerph19020800)
Supplement: Supplementary file 1 [file ijerph-19-00800-s001.zip]

Archive with 4 entries (4 files):
- File S1 - A3 Report.pdf
- File S2 - Pre-project interview sheet.pdf
- File S3 - Post-project interview sheet.pdf
- File S4 - Waste identified in the project.xlsx
