# Supplementary material for: Implementation of Lean Management in a Multi-Specialist Hospital in Poland and the Analysis of Waste
Source: Int J Environ Res Public Health. 2022 Jan 12;19(2):800. doi: 10.3390/ijerph19020800 (PMC8775623; doi:10.3390/ijerph19020800)
Supplement: Supplementary file 1 [file ijerph-19-00800-s001.zip › File S4 - Waste identified in the project.xlsx]

## Sheet: WASTE
A.1
Ordinal number	MUDA	DEPARTMENT/AREA	OBSERVATION	Proposed SOLUTION
1	waste of overprocessing	GE - Admission Room	Entering data from referrals (barcodes, etc.)	Transition to electronic documentation. The system enables the creation of the required documentation. Staff must be trained.
2	waste of overprocessing	GE - Doctors		Verification of system capabilities
3	waste of overprocessing	GE - Doctors	Unable to generate prescriptions	Verification of system capabilities
4	waste of overprocessing	GE - Doctors		Transition to electronic documentation. The system enables the creation of the required documentation. Staff must be trained.
5	waste of overprocessing	GE - Nurses	Multiple injections of the patient (in the admission room and in the ward)	Extend the panel of examinations ordered in the admission room.
6	waste of overprocessing	GE - Nurses	Balances written in a notebook by a nurse and then rewritten by a doctor	Transition to electronic documentation. The system enables the creation of the required documentation. Staff must be trained.
7	waste of overprocessing	GE - Nurses	Injections and catheters recorded in the nursing and epidemiological documentation	Transition to electronic documentation. The system enables the creation of the required documentation. Staff must be trained.
8	waste of overprocessing	GE - Nurses	Name and surname are written 7x in the patient's file	Transition to electronic documentation. The system enables the creation of the required documentation. Staff must be trained.
9	waste of overprocessing	GE - Nurses	Handwritten medication stickers	Transition to electronic documentation. The system enables the creation of the required documentation. Staff must be trained.
10	waste of overprocessing	Internal Medicine 10 - Head of Department
11	waste of overprocessing	Internal Medicine 6 - Admission Room		Assessment whether there is one dispatcher or several companies
12	waste of overprocessing	Internal Medicine 6 - Doctors	For ordering transport home or external consultation, the hospital requires the doctor to write the order in the system or manually, and then to make a phone call to the administration to order transport and repeat the information, which is recorded by the woman from the hospital administration	Ordering directly from the operator. Change and standardization of the form of the transport referral and the hospital transport calendar - the queue of orders
13	waste of motion	GE - Admission Room
14	waste of motion	GE - Doctors	Unable to view histopathological results in the system	Interface between systems so that results can be seen in the AMMS system
15	waste of motion	GE - Doctors	The lack of the results in the system and missed calls make doctors go to the secretary's office and the laboratory	Interface between systems so that results can be seen in the AMMS system
16	waste of motion	GE - Nurses	Patient "transferred" around the hospital (in the admission room and in the ward)
17	waste of motion	GE - Nurses	No space for nursing interview - no separate room	Find a place, e.g. a room next to the ward matron’s office
18	waste of motion	Internal Medicine 6 - Admission Room	No glazed door - insistent and aggressive patients	Install the door with the electromagnet/glazed
19	waste of motion	Internal Medicine 6 - Doctors	Transferring patients between the medical staff (Doctor-Resident) extends the stay	how to verify it?
20	waste of motion	Internal Medicine 6 - Doctors	A large number of ordered transport - no analysis how many patients needed to be transported	introduction of a medical transport assessment card
21	waste of overproduction	GE - Admission Room	Manually completed documentation	Transition to electronic documentation. The system enables the creation of the required documentation. Staff must be trained.
22	waste of overproduction	GE - Admission Room	Entering data from the ID card to the system for patients who have already been to the admission room	Transition to electronic documentation. The system enables the creation of the required documentation. Staff must be trained.
23	waste of overproduction	GE - Doctors	Unjustified printing of referrals to the laboratory and endoscopy	Transition to electronic documentation. The system enables the creation of the required documentation. Staff must be trained.
24	waste of overproduction	GE - Doctors	Rewriting basic information in medical information cards	Transition to AMMS - for some cards, it is possible to auto-complete data
25	waste of overproduction	GE - Doctors	A very large number of documents in paper form. Meaningless	Transition to electronic documentation. The system enables the creation of the required documentation. Staff must be trained.
26	waste of overproduction	GE - Doctors	Printing an order card for each order and each shift (even if the change has been loaded in the system)	Transition to electronic documentation. The system enables the creation of the required documentation. Staff must be trained.
27	waste of overproduction	GE - Doctors	A large number of patients come to the hospital because they want to be examined under anesthesia	Patient information program
28	waste of overproduction	GE - Nurses	A large number of notebooks that form the basis of information flow	Transition to electronic documentation. The system enables the creation of the required documentation. Staff must be trained.
29	waste of overproduction	GE - Nurses	Measurement of basic patient parameters (e.g. weight, blood pressure) by both nursing and medical staff	Transition to electronic documentation. The system enables the creation of the required documentation. Staff must be trained.
30	waste of overproduction	Internal Medicine 10 - Doctors	The Order Card Sheet allows to keep documentation for only 4 days. In the case of day 5, it is necessary to create another card and rewrite the information	Transition to electronic documentation. The system enables the creation of the required documentation. Staff must be trained.
31	waste of overproduction	Internal Medicine 10 - Head of Department	Documentation kept in the paper form. The system is used to a very small extent.	Transition to electronic documentation. The system enables the creation of the required documentation. Staff must be trained.
32	waste of overproduction	Internal Medicine 10 - Nurses	Keeping double paper documentation, e.g. catheterization card, cannula card, pressure ulcer card	Transition to electronic documentation. The system enables the creation of the required documentation. Staff must be trained.
33	waste of overproduction	Internal Medicine 10 - Nurses	Delivering the patient's consents for Endoscopy (the rule is that the patient's referral and consents must be delivered to the endoscopy secretary by 1 p.m. on the previous day)	Installation of a hydraulic tube in strategic areas, such as endoscopy
34	waste of overproduction	Internal Medicine 6 - Admission Room	Duplication of injections and examinations in the admission room (examination panel) vs. department (medical order)	Expanding the examination panel in the admission room in order to profile the patient at the beginning, e.g. Ca, faeces
35	waste of overproduction	Internal Medicine 6 - Admission Room	Doctors do not know the priorities of transports (1st T with the Doctor, 2nd Children, 3rd Consultation, 4th T home)	Transition to electronic documentation, also for transport orders
36	waste of overproduction	Internal Medicine 6 - Doctors	The key to admitting patients to wards 6, 9 and 10 is the so-called "turn" in the admission room - that is, everyone accepts only to their own department. Patients are registered in departments unevenly, i.e. first up to a maximum of 1 department, then the next, etc.	Change of an admission key to wards
37	waste of overproduction	Internal Medicine 6 - Doctors	A large number of tests ordered for some patients	Standardization of collections and saving in a collective file on the ward vs. patient - number of days, number of tests - automatic writing down from Excel order cards
38	waste of overproduction	Internal Medicine 6 - Doctors	Accumulation of patient admissions in departments.	Analysis of admission time vs. Department 6, 9, 10. Levelling admissions (e.g. versus a disease)
39	waste of overproduction	Internal Medicine 6 - Doctors	Tests ordered unevenly on different days	Analysis - number and type of examinations vs. Departments 6, 9, 10 - and the attending physician
40	waste of overproduction	Internal Medicine 6 - Nurses	Intravenous drugs used from the beginning to the end of the patient's stay in the ward
41	waste of overproduction	Internal Medicine 6 - Nurses
42	waste of overproduction	Internal Medicine 6 - Nurses	The patients come from the admission rome collectively	Calling patients to the ward from the admission room - waiting of the patients to enter the ward/paramedics bring each patient separately and not collectively
43	waste of overproduction	Internal Medicine 6 - Nurses	Analysis of the number of material collections for tests per patient
44	waste of overproduction	Internal Medicine 6 - Nurses	Documentation carried out in duplicate: injections, catheters, bedsores card. The system only covers: test coding, admission confirmation, ordering medications (prescription). A very large amount of paper documentation - 12 forms for each patient	Transition to electronic documentation. The system enables the creation of the required documentation. Staff must be trained.
45	waste of overproduction	Internal Medicine 6 - Nurses	Doctors have at their disposal a whole range of tests that they sometimes use redundantly	1. Analysis of the laboratory area 2. Organizational workshop with the participation of the Head of Department, Medical Director, department doctors and the Head of the Laboratory in order to establish guidelines and good practices. Building a set of tests for a particular department with the consent of the Head of Department and Medical Director 3. Introducing the average cost index and the numb…
46	blame	Internal Medicine 10 - Head of Department	A large number of emergency patients compared to elective patients (approx. 95% vs. 5%), probably affects the length of the patient's stay
47	blame	Internal Medicine 6 - Nurses	Nurses deliver equipment from the warehouse, e.g. water	To be agreed with the administration or technical support
48	waste of waiting	GE - Doctors	Test results obtained too late prevent early discharge	Change in the organization of work. The examinations for elective patients for discharge should be ordered the day before. In the morning, at 5-6 a.m., material is collected and sent to the laboratory as CITO. The results on the ward at 9:00. Discharge by 12:00
49	waste of waiting	GE - Doctors		Detailed analysis of the work of endoscopic laboratory
50	waste of waiting	GE - Doctors	Descriptions of endoscopic examinations are entered into the Olympus system by the doctor performing the examination, and then thaey are manually pasted by the endoscopy secretary to the AMMS hospital system, which unnecessarily extends the process of receiving descriptions by the ward and the attending physician	Interface between systems so that results can be seen in the AMMS system
51	waste of waiting	GE - Doctors	Discharge performed mainly by attending physicians	The doctor on duty can also discharge patients
52	waste of waiting	GE - Nurses	Medical orders written out late
53	waste of waiting	GE - Nurses	Waiting for the room, bed
54	waste of waiting	GE - Nurses	Long terms for endoscopic examinations	One, consistent calendar of free endoscopic examination dates for all departments with the rules regarding the number of ordered examinations and the method of booking slots.
55	waste of waiting	GE - Nurses	Waiting for discharge	Change in the organization of work. The examinations for elective patients for discharge should be ordered the day before. In the morning, at 5-6 a.m., material is collected and sent to the laboratory as CITO. The results on the ward at 9:00. Discharge by 12:00
56	waste of waiting	GE - Nurses		Determine the principles of fast communication and priorities with transport
57	waste of waiting	Internal Medicine 10 - Doctors	Waiting (1-3 days) for a substantive response to the internal consultation, e.g. surgical
58	waste of waiting	Internal Medicine 10 - Doctors	Extended waiting time for searching a doctor for external consultation from another hospital in the field of: orthopedics, urology, gynecology
59	waste of waiting	Internal Medicine 10 - Doctors	Extended waiting time for endoscopic examinations, e.g. head MRI (approx. 5 days), and gastric MRI approx. 10-15 days
60	waste of waiting	Internal Medicine 10 - Doctors		Create a sub-unit for chronically ill patients. An internal care facility that would be dedicated, for example, to seeking social assistance, etc.
61	waste of waiting	Internal Medicine 10 - Doctors	Limited number of ultrasound examinations made by the Radiology Department - 4 a day. Ultrasound cannot be done at the admission room - there is no radiologist in the afternoon. Then they call and seek support in other departments with poor results (6, 7, 9 refuse). The patient additionally waits for about 1-2 days. The lack of a trained person in the ward with a certificate enabling ultrasound e…
62	waste of waiting	Internal Medicine 10 - Head of Department	Waiting for test descriptions sometimes lengthens the discharge (teleradiology), e.g. magetic resonance (1-2 days)
63	waste of waiting	Internal Medicine 10 - Head of Department	The problem with the extended waiting time for home transport. On Fridays (5/10 patients). Often cancelling transports (several times a month). A note from the Head of Department
64	waste of waiting	Internal Medicine 10 - Nurses	Problem with constant relogging - not enough computers in the nursing office.	"2 computers would solve the problem"
65	waste of waiting	Internal Medicine 10 - Nurses		Changing the model of ordering and delivering patients. Use non-medical transport
66	waste of waiting	Internal Medicine 6 - Doctors		More detailed analysis of the situation is required
67	waste of waiting	Internal Medicine 6 - Doctors		Analysis and / or change of the transfusion system to daily-scheduled
68	waste of waiting	Internal Medicine 6 - Doctors		Establishing a clear treatment plan with the patient
69	waste of waiting	Internal Medicine 6 - Doctors	Discharge performed only by attending physicians
70	waste of waiting	Internal Medicine 6 - Doctors	Waiting for transport extends the stay (home, for consultations)	Determine the principles of fast communication and priorities with transport
71	waste of waiting	Internal Medicine 6 - Doctors	Antibiotic therapy - no standard on the number of days of using intravenous drugs (more expensive), and then switching to oral drugs (cheaper). Currently, intravenous injection is used for 3-4 days, and then orally - check!	Determining the standard of intravenous drug administration and monitoring it in the collective file by Head of the Department
72	waste of waiting	Internal Medicine 6 - Doctors	We do not mobilize patients physically - we do not use, for example, rehabilitation in the ward - the patient often lies the entire stay, while moving speeds up the possibility of leaving the ward sooner or, for example, we serve meals to the patient when he is lying down
73	waste of waiting	Internal Medicine 6 - Doctors	Extended waiting time for laboratory results, e.g. the doctor does not receive the results until 12:00 and often misses the discharge during the day and the patient waits for the next day. This happens mainly at "6" rather than at "6A"	Change in the organization of work. The examinations for elective patients for discharge should be ordered the day before. In the morning, at 5-6 a.m., material is collected and sent to the laboratory as CITO. The results on the ward at 9:00. Discharge by 12:00
74	waste of waiting	Internal Medicine 6 - Doctors	The lack of support from a Microbiologist who could help interpret cultures and decide on the choice of antibiotic and duration of treatment. Currently, doctors make their own decisions and do not always know if they are justified, therefore, for the patient's benefit, they order additional cultures, which extends the stay by an additional approx. 5 days.	Establishing the rules of cooperation with the Laboratory. There are 5 microbiologists available.
75	waste of waiting	Internal Medicine 6 - Doctors	Patients are not picked up on time	Verify legal possibilities regarding the activation of fees for each additional day of stay from the date of discharge
76	waste of waiting	Internal Medicine 6 - Nurses	Patients are not picked up on time.Too late diabetes education (glucose meter operation, insulin administration)	The assessment of the patient’s condition by a diabetes carer
77	waste of waiting	Internal Medicine 6 - Nurses	Waiting a patient for a bed (2-6h)	Earlier discharge should significantly reduce this time
78	waste of defects	GE - Doctors	The extended histopathological process	More careful analysis is required
79	waste of defects	GE - Doctors	No cyclical analysis of expenses and costs	Introduce in the department Dashboard for basic indicators and establish the principle of daily monitoring together with the staff
80	waste of defects	GE - Nurses	The need to repeat endoscopic examinations	Implement and monitor the error rate
81	waste of defects	GE - Nurses	Amendments to medical records	Transition to electronic documentation. The system enables the creation of the required documentation. Staff must be trained.
82	waste of defects	GE - Nurses	The patient is disqualified only in the ward, after additional tests have been performed	The admission room and the doctor admitting the patient should use extended verification program
83	waste of defects	GE - Nurses	Dressings (poor plasters, gauze pads), infusion fluids (only available in bags), poor quality of infusion devices
84	waste of defects	GE - Nurses		Test a few others and verify the product tender list
85	waste of defects	GE - Nurses	Inconsistent or missing data (system vs. notebook)	Transition to electronic documentation. The system enables the creation of the required documentation. Staff must be trained.
86	waste of defects	GE - Nurses	The lack of communication on discharge records between nurses and doctors - rooms and beds are empty	Establish communication rules. Perhaps a joint board with the marked stages of the patient's stay
87	waste of defects	GE - Nurses	The website needs updating - receiving numerous phone calls that do not relate to the work of the department	Updating information on the website
88	waste of defects	GE - Nurses	Patients ill-prepared for staying at the ward – forgot drugs, took money, computers, valuables, jewellery, painted nails	Introduce patient information leaflets on preparation before coming to the ward. The leaflets could be handed over at the time of patient's admission to the ward or introduce an information poster for elective patients
89	waste of defects	Internal Medicine 10 - Doctors	The lack of standard when obtaining information from patients in the admission room sometimes results in incomplete information and delay in starting diagnostic and treatment activities, e.g. abdominal pain or the level of hemoglobin 6 may be omitted as important symptoms. Doctor's Note	Medical history form developed jointly, standardized. Moreover, the information data should be completed additionally by patients on an additional form prior to registration in the admission room
90	waste of defects	Internal Medicine 10 - Nurses
91	waste of defects	Internal Medicine 6 - Admission Room		Create 1 file on a network drive with an access for dedicated people
92	waste of defects	Internal Medicine 6 - Doctors	Urease tests - no marking in the AMMS system made by the secretary of the Gastroetnerology (endoscopy) laboratory	Marking the information about the result in the system ???? - to be asked
93	waste of defects	Internal Medicine 6 - Doctors	Different order cards in different wards (4 - Anest, 6, 9, 10, Gastro, etc ..) result in incorrectly written cards. Rewriting is sometimes required	Standardization of the order card - electronic form
94	waste of defects	Internal Medicine 6 - Doctors
95	waste of defects	Internal Medicine 6 - Nurses	Adding tests to orders after 12:00 - (contrary to the principle that everything should be ready and saved by 12:00)	Patient's treatment plan - card available to the nurse
96	searching and explaining	GE - Admission Room	No fixed hours and queue list	Queuing
97	searching and explaining	GE - Admission Room	There is no zip code on the referral and in the system
98	searching and explaining	GE - Admission Room	No room is assigned to the patient in the ward
99	searching and explaining	GE - Admission Room	Statement forms are available only in the admission room	Could be accessed by the patient
100	searching and explaining	GE - Doctors
101	searching and explaining	GE - Doctors	Looking for surveys, consents, referrals	AMMS training
102	searching and explaining	GE - Doctors	No monitoring of ordered tests (what, where, when?)	One, consistent calendar of free endoscopic examination dates for all departments with the rules regarding the number of ordered examinations and the method of booking slots.
103	searching and explaining	GE - Doctors	No database with the information on discharge of the patient (where, to whom, contact phone number)	Prepare a list with the required information
104	searching and explaining	GE - Nurses	No medical orders (physically in paper form)
105	searching and explaining	GE - Nurses	There is no current information on the performed examinations	One, consistent calendar of free endoscopic examination dates for all departments with the rules regarding the number of ordered examinations and the method of booking slots.
106	searching and explaining	GE - Nurses	The lack of information on how to treat the patient after examinations - no guidelines from endoscopy laboratories and the staff's unawareness of these rules	Training of medical personnel
107	searching and explaining	GE - Nurses	Problems with reading doctor’s handwriting	Transition to electronic documentation. The system enables the creation of the required documentation. Staff must be trained.
108	searching and explaining	GE - Nurses	Looking for keys
109	searching and explaining	Internal Medicine 10 - Doctors
110	searching and explaining	Internal Medicine 10 - Doctors	"We spend 20% of our time on the phone looking for a new location for a patient, family or external consultation." Doctor's note
111	searching and explaining	Internal Medicine 10 - Doctors	Difficult cooperation between internal medicine departments 6, 9, 10 in terms of assistance in performing ultrasound examinations, sharing patients based on the availability of free beds. No regime bed organization. Doctors from ward VII verify the actual availability of beds in ward 10. Doctor's note
112	searching and explaining	Internal Medicine 10 - Head of Department
113	searching and explaining	Internal Medicine 10 - Nurses	The lack of complete information from a doctor on medical orders results in a waste of time searching for, for example, the method of administering drugs
114	searching and explaining	Internal Medicine 6 - Admission Room	Admission room employees do not know how many hours the CITO tests description takes	Analysis of the average time of obtaining results from teleradiology
115	searching and explaining	Internal Medicine 6 - Admission Room		Transition to electronic documentation. The system enables the creation of the required documentation. Staff must be trained.
116	searching and explaining	Internal Medicine 6 - Admission Room		Ordering directly from the operator. Change and standardization of the form of the transport referral and the hospital transport calendar - the queue of orders
117	searching and explaining	Internal Medicine 6 - Doctors		Change card to Excel / name and number of pages
118	searching and explaining	Internal Medicine 6 - Doctors	There is no standard of what tests should be performed the day before discharge	Test standard and discharge plan for the next day being discussed at the morning briefing
119	searching and explaining	Internal Medicine 6 - Doctors	Upon admission, we do not collect information about the patient's telephone number. Most often we only have a family phone number	Introduction of obligatory fields in patient admission - communication with the admission room
120	searching and explaining	Internal Medicine 6 - Doctors	On admission, no information is collected from patients about the medications used so far	Introduction of information for patients / family about the need to show the list of all taken medications in order to correctly establish the diagnostic process
121	searching and explaining	Internal Medicine 6 - Doctors
122	searching and explaining	Internal Medicine 6 - Doctors		Introduction of descriptions of doctors and their contact details
123	searching and explaining	Internal Medicine 6 - Doctors	The lack of basic documents in AMMS, e.g. patient's consent and orders for endoscopic examinations. This causes an intranet lookup for prints. It is very difficult to find documents in the system (intranet), e.g. a referral to physiotherapy. The lack of a search function makes it impossible to find the document. Then the document is printed and completed manually	Backup on the department disk
124	searching and explaining	Internal Medicine 6 - Nurses	2 different nursing offices that work according to various standards, e.g. as above	Introduction of common indicators for the department and check-in boards
125	searching and explaining	Internal Medicine 6 - Nurses	Medicines - no pharmaceutical names / abbreviations	Introducing a common, clear standard of names - introducing drugs from a hospital pharmacy into the excel database when writing out an order card
126	searching and explaining	Internal Medicine 6 - Nurses		Set standards for drugs
127	waste of inventory	GE - Nurses	The extensive portfolio of drugs and examinations causes overuse	Introduce restrictions and initiate a control of prescribed drugs and tests by Head of Department
128	waste of human, material and service potential	GE - Doctors		Establish the rules with Head of Department
129	waste of human, material and service potential	GE - Doctors		Establish the rules with the Medical Director, the Head of Department and the Head of Anesthesiological Department for which procedures anesthesia may be performed by a doctor
130	waste of human, material and service potential	Internal Medicine 10 - Doctors	Antibiotic therapy - no standard for the number of days of using intravenous drugs (more expensive), and then switching to oral drugs (cheaper). Currently, the decision is up to the attending physician
131	waste of human, material and service potential	Internal Medicine 10 - Doctors	Uneven way of registering patients to the wards (6, 9, 10) - the so-called "TURNS"
132	waste of human, material and service potential	Internal Medicine 10 - Doctors	No prescriptions in AMMS
133	waste of human, material and service potential	Internal Medicine 10 - Doctors	The lack of staff knowledge about the system's capabilities. The staff is not able to navigate in the system and does not know the basic functions	Recording tutorials showing how to use the system. For this purpose, a team should be appointed with the help of Dr. Golec as the leader of the AMMS program implementation, which would make video recordings.
134	waste of human, material and service potential	Internal Medicine 10 - Nurses	The very small space of the nursing office with a small number of computers makes the working day difficult	Extension of the office with the current social room - demolition of a cardboard wall
135	waste of human, material and service potential	Internal Medicine 6 - Doctors	The doctor on duty, who is to secure the admission room outside the "hourly turns 6,9,10", in reality does not secure in 100%	The staff of the admission room claim that the doctor always comes to the patient
136	waste of human, material and service potential	Internal Medicine 6 - Doctors	The lack of triage in the admission room results in the absence of information in the ward about which patient is in the severe condition and requires faster actions	Nurses could do some things without a medical order card (blood pressure, ECG, partially assess) - building a common standard for admissions in the admission room
137	waste of human, material and service potential	Internal Medicine 6 - Nurses	Unused potential of AMMS!!! (setting default formats, duty reports, keeping complete and comprehensive documentation) - No stage of system implementation!	Transition to electronic documentation. The system enables the creation of the required documentation. Staff must be trained.
